# Supplementary material
Source: Springer Nature journal article supplement (https://www.springermedizin.de/resource/supplementary/12890_2010_259_MOESM3_ESM.pdf/9504818)

# TOM1

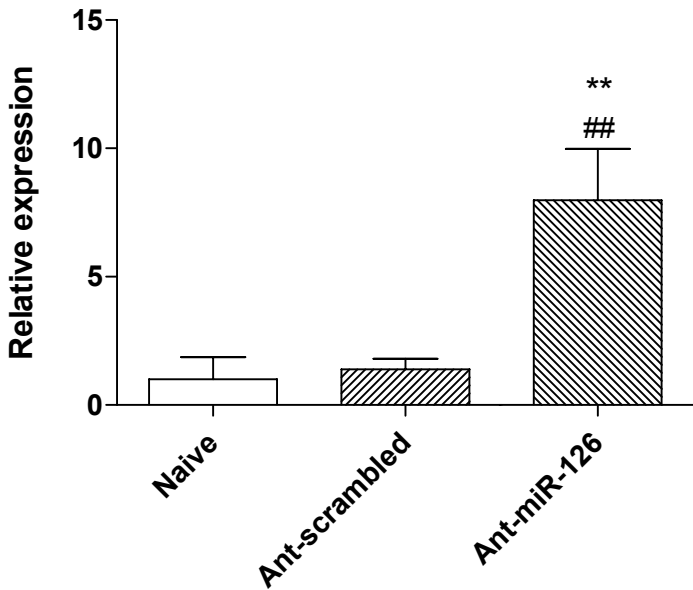

Supplement: MOESM3 [file 9504818]
